# Supplementary material for: The epigenomic landscape of transposable elements across normal human development and anatomy
Source: PubMed Central journal article supplement (PMC6904449; doi:10.1038/s41467-019-13555-x), 2019-12-10
Supplement: 41467_2019_13555_MOESM2_ESM.pdf [file 41467_2019_13555_MOESM2_ESM.pdf]

### **Description of Additional Supplementary Files**

File Name: Supplementary Data 1

Description: TEs in an epigenetic state in all epigenomes.

File Name: Supplementary Data 2

Description: Permutation results for proportion of the state in TEs.

File Name: Supplementary Data 3

Description: Roadmap epigenome classifications.

File Name: Supplementary Data 4

Description: TE subfamilies preferentially enriched in epigenome categories.
